# Supplementary material
Source: MDPI journal article supplement (https://www.mdpi.com/2071-1050/8/1/98)
Supplement: s1 [file s1]

# Supplementary Materials: Possible Futures towards a Wood-Based Bioeconomy: A Scenario Analysis for Germany

Nina Hagemann, Erik Gawel, Alexandra Purkus, Nadine Pannicke and Jennifer Hauck

**Table S1.** List of analysed scenarios and identified influence factors.

| No. | Scenario                | Influence Factors                                                                                                                                                                                                                                                                                                                                                                                                                                                                                                                                                                                                                                                                                                                                                                                                                                                                                                                                                                                                                                                                                                                                                                                                                                                                                               |
|-----|-------------------------|-----------------------------------------------------------------------------------------------------------------------------------------------------------------------------------------------------------------------------------------------------------------------------------------------------------------------------------------------------------------------------------------------------------------------------------------------------------------------------------------------------------------------------------------------------------------------------------------------------------------------------------------------------------------------------------------------------------------------------------------------------------------------------------------------------------------------------------------------------------------------------------------------------------------------------------------------------------------------------------------------------------------------------------------------------------------------------------------------------------------------------------------------------------------------------------------------------------------------------------------------------------------------------------------------------------------|
| 1   | GEO4 Scenarios [1]      | <ul style="list-style-type: none"> <li>• Institutional and socio-political frameworks</li> <li>• Demographics</li> <li>• Economic demand, markets and trade</li> <li>• Scientific and technological innovation</li> <li>• Value systems</li> </ul>                                                                                                                                                                                                                                                                                                                                                                                                                                                                                                                                                                                                                                                                                                                                                                                                                                                                                                                                                                                                                                                              |
| 2   | Land use scenarios [2]  | <ul style="list-style-type: none"> <li>• Regional population development</li> <li>• Development of renewable energies</li> <li>• Raw material scarcity</li> <li>• Public participation and volunteering</li> <li>• Spatial planning and regional development</li> <li>• Fields of public responsibilities and investments</li> <li>• Birth rates</li> <li>• International migration/refugees</li> <li>• Inner German migration</li> <li>• Rate of privatization</li> <li>• Resource and environment protection</li> <li>• GDP growth</li> <li>• Index for sustainable economic wealth</li> <li>• Development of energy consumption and supply</li> <li>• Consumption patterns</li> </ul>                                                                                                                                                                                                                                                                                                                                                                                                                                                                                                                                                                                                                        |
| 3   | Forest Futures 2100 [3] | <ul style="list-style-type: none"> <li> <ul style="list-style-type: none"> <li>○ Social change</li> <li>How society deals with demographic change</li> <li>○ Leisure time activities and tourism</li> </ul> </li> <li>• Society           <ul style="list-style-type: none"> <li>○ Environmental awareness and behavior</li> <li>○ Regional development and local policies</li> <li>○ Society's valuation and use of forests</li> <li>○ Work in the forest and its surroundings</li> </ul> </li> <li>• Technology           <ul style="list-style-type: none"> <li>○ Innovations in the material use of wood</li> <li>○ Innovations in the energetic use of wood</li> <li>Innovative harvesting methods and innovation in the supply/ provision of wood</li> </ul> </li> <li>• Economy           <ul style="list-style-type: none"> <li>Globalisation and global economic development</li> <li>Fossil and renewable energy sources</li> <li>Domestic economic development</li> <li>Attractiveness of competing forms of land use</li> <li>Demand for wood</li> <li>Structure of the wood utilising industry</li> <li>Availability of raw wood</li> <li>Business development and qualification</li> <li>Demand for other forest services</li> <li>Ownership structure and property rights</li> </ul> </li> </ul> |

**Table S1. Cont.**

| No. | Scenario                                                                                                                                                                      | Influence Factors                                                                                                                                                                                                                                                                                                                                           |
|-----|-------------------------------------------------------------------------------------------------------------------------------------------------------------------------------|-------------------------------------------------------------------------------------------------------------------------------------------------------------------------------------------------------------------------------------------------------------------------------------------------------------------------------------------------------------|
|     |                                                                                                                                                                               | Global climate change<br>Site conditions<br>• Ecology Forest structure<br>Forest management<br>Hunting                                                                                                                                                                                                                                                      |
|     |                                                                                                                                                                               | • Politics Energy and climate policies<br>Environmental and nature conservation policies<br>Technology, innovation and research policies<br>Economic, competition, tax and fiscal policies<br>Forest policies                                                                                                                                               |
| 4   | OECD: The Bioeconomy to 2030 [4]                                                                                                                                              | Population and income<br>Demographics and human resources<br>Energy consumption and climate change<br>Agriculture, food prices and water<br>Healthcare costs<br>Supporting and competing technologies                                                                                                                                                       |
| 5   | Future Scenarios for Michigan's Bioeconomy [5]                                                                                                                                | Technological development<br>Rate of investments<br>Policies<br>Values and consumer behavior<br>Availability of biomass                                                                                                                                                                                                                                     |
| 6   | German chemical industry 2030 [6]                                                                                                                                             | Development of resource efficiency<br>Development of innovations (to succeed in international competition)<br>Development of labor supply, including qualified employees                                                                                                                                                                                    |
| 7   | Global implications of biomass and biofuel use in Germany – recent trends and future scenarios for domestic and foreign agricultural land use and resulting GHG emissions [7] | Domestic production based on national biomass production<br>Domestic production based on imported biomass<br>Product imports                                                                                                                                                                                                                                |
| 8   | UK National Ecosystem Assessment [8]                                                                                                                                          | Climate change<br>Conversion of natural and semi-natural habitats<br>Pollution of air, land and water<br>Overexploitation of terrestrial, marine and freshwater resources<br>Invasive species<br>Consumption<br>Demographic factors<br>Sociopolitical factors<br>Economic factors<br>Scientific and technological factors<br>Cultural and religious factors |

Table S1. *Cont.*

| No. | Scenario                                                                                       | Influence Factors                                                                                                                                                                                                                                                                                                                                                                                                                                                                                                                                                                                                            |
|-----|------------------------------------------------------------------------------------------------|------------------------------------------------------------------------------------------------------------------------------------------------------------------------------------------------------------------------------------------------------------------------------------------------------------------------------------------------------------------------------------------------------------------------------------------------------------------------------------------------------------------------------------------------------------------------------------------------------------------------------|
| 9   | Scenarios of technology and innovation policies in Europe: Investigating future governance [9] | Dynamics of economic globalisation<br>Current and future technology regimes<br>Competition and related patterns of specialization of national, regional and sectoral innovation systems<br>Development of a European political system as opposite pole to national and regional systems<br>Orientation and strategies of multi-national enterprises<br>Specialisation and internalization strategies of higher education institutions<br>Government research institutions and technology organisations<br>National and regional state authorities<br>European authorities such as European Commission or European Parliament |

## References

1. United Nations Environmental Programme (UNEP). *Global Environment Outlook 4. Environment for Development*; UNEP: Nairobi, Kenya, 2007.
2. Hauck, J.; Priess, J.A. "The most likely future isn't": Landnutzungsszenarien für Mitteldeutschland. *Raumforsch. Raumordn.* **2013**, *71*, 397–411. (In German)
3. Steinmüller, K.; Schulz-Montag, B.; Veenhoff, S.. Waldzukünfte 2100. Szenarioreport. Available online: [http://www.z-punkt.de/fileadmin/be\\_user/D\\_CorporateForesight/Wald2100\\_Szenreport\\_090603\\_kons.pdf](http://www.z-punkt.de/fileadmin/be_user/D_CorporateForesight/Wald2100_Szenreport_090603_kons.pdf) (accessed on 7 April 2015). (In German)
4. The Organisation for Economic Co-operation and Development (OECD). *What External Factors Will Drive the Bioeconomy to 2030? The Bioeconomy to 2030: Designing a Policy Agenda*; OECD Publishing: Paris, France, 2009.
5. Michigan State University (MSU) Product Center and Shepherd Advisors. Future Scenarios for Michigan's Bioeconomy: Planning Your Strategic Responses. Available online: [http://productcenter.msu.edu/uploads/files/Future Scenarios for Michigans Bioeconomy.pdf](http://productcenter.msu.edu/uploads/files/Future_Scenarios_for_Michigans_Bioeconomy.pdf) (accessed on 18 January 2016).
6. Verband der Chemischen Industrie e.V. (VCI). Die deutsche chemische Industrie 2030. VCI-Prognos-Studie. Available online: <https://www.vci.de/vci/downloads-vci/publikation/langfassung-prognos-studie-30-01-2013.pdf> (accessed on 7 April 2015).
7. Bringezu, S.; Schütz, H.; Arnold, K.; Merten, F.; Kabasci, S.; Borelbach, P.; Michels, C.; Reinhardt, G.A.; Rettenmaier, N. Global implications of biomass and biofuel use in Germany—Recent trends and future scenarios for domestic and foreign agricultural land use and resulting GHG emissions. *J. Clean. Product.* **2009**, *17*, 57–68.
8. UK National Ecosystem Assessment (UK NEA). Technical Report. Available online: [uknea.unep-wcmc.org/Resources/tabid/82/Default.aspx](http://uknea.unep-wcmc.org/Resources/tabid/82/Default.aspx) (accessed on 8 April 2015).
9. Kuhlmann, S.; Edler, J. Scenarios of technology and innovation policies in Europe: Investigating future governance. *Technol. Forecast. Soc. Chang.* **2003**, *70*, 619–637.
